# Supplementary material for: Asian Flush Gene Variant Enhances Cellular Immunogenicity of COVID‐19 Vaccine: Prospective Study in the Japanese General Population
Source: Preprints.org preprint supplement (doi:10.20944/preprints202408.1453.v1), 2024-08-20
Supplement: Supplementary file 1 [file supplementary]

**Supplementary Material**

**Figure S1. Cross-reactivity to SARS-CoV-2 delta and omicron variants**

Some specimens were evaluated for reactivity against two different peptide mixtures: the original and delta variants (PM-SARS2-SMUT06-1) and the original and omicron variants (PM-SARS2-SMUT08-1). Cross-reactivity was evaluated between the original and delta variants in PBMCs from 74 blood samples from subcohort 1 (three weeks after one dose, and one and three months after the second dose) and subcohort 2, and between the original and omicron variant in PBMCs from 55 samples from subcohort 1 (six months after the second dose and one month after the third dose). PBMC, peripheral blood mononuclear cell
